# Supplementary material
Source: PubMed Central journal article supplement (PMC6054435)
Supplement: DB171342SupplementaryData.pdf [file DB171342SupplementaryData.pdf]

SUPPLEMENTARY DATA

**Supplementary Figure 1. Generation of KRRKI mice.** A targeted strategy was used to insert three point mutations into exon 8 of the mouse ER $\alpha$  gene to replace amino acids at positions 235, 237, and 238 with alanine.

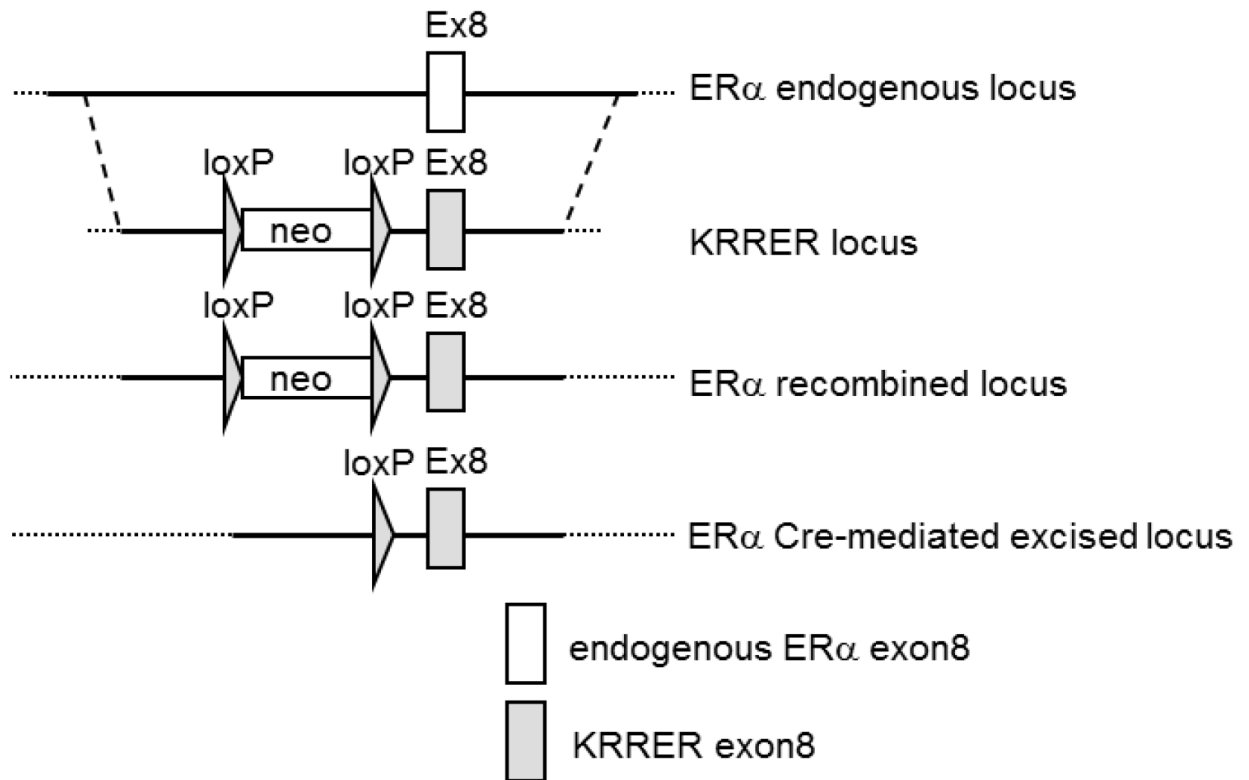

SUPPLEMENTARY DATA

**Supplementary Figure 2. A.** Co-immunoprecipitation of ER $\alpha$  with striatin. Proteins were extracted from the hypothalamus, pWAT, iWAT, and BAT tissues of WT and KRR<sup>ki/ki</sup> mice, immunoprecipitated using an ER $\alpha$  antibody, and immunoblotted using an antibody against striatin. Representative immunoblots are shown. qRT-PCR analysis for ERE-related genes in the hypothalamus (**B**) and ER $\beta$  (*esr2*) in various tissues (**C**) (n = 6 per group). \* *P* < 0.05. **D:** Body weight of male mice (n = 9-14) over the course of the study. # *P* < 0.01 vs. ER $\alpha$ <sup>+/+</sup> (left panel) or WT (right panel) mice. **E:** Body weights of WT and KRR<sup>ki/ki</sup> mice with or without ovariectomy (OVX) (n = 8-10). # *P* < 0.01 vs. WT without ovariectomy. Data are presented as mean  $\pm$  SEM.

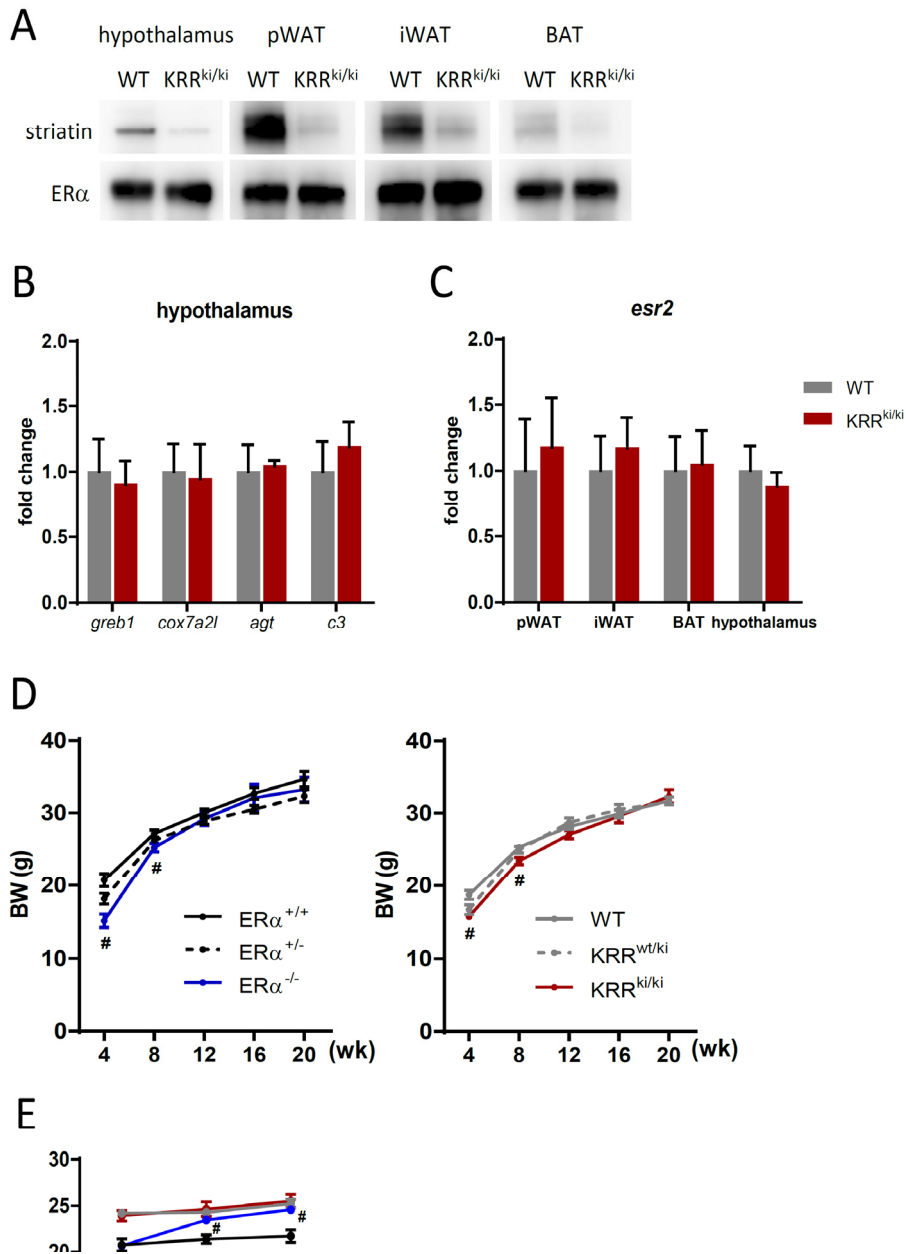

SUPPLEMENTARY DATA

**Supplementary Figure 3. Loss of membrane-initiated ER $\alpha$  signaling decreases energy expenditure independently of food intake at 4-weeks of age.** Body weight (A), daily food intake (B), body temperature at ambient temperature (C), oxygen consumption (D), and locomotor activity (E) of WT and KRR<sup>ki/ki</sup> mice at 4-weeks of age (n = 6 per group). \*  $P < 0.05$ , #  $P < 0.01$ . Data are presented as mean  $\pm$  SEM.

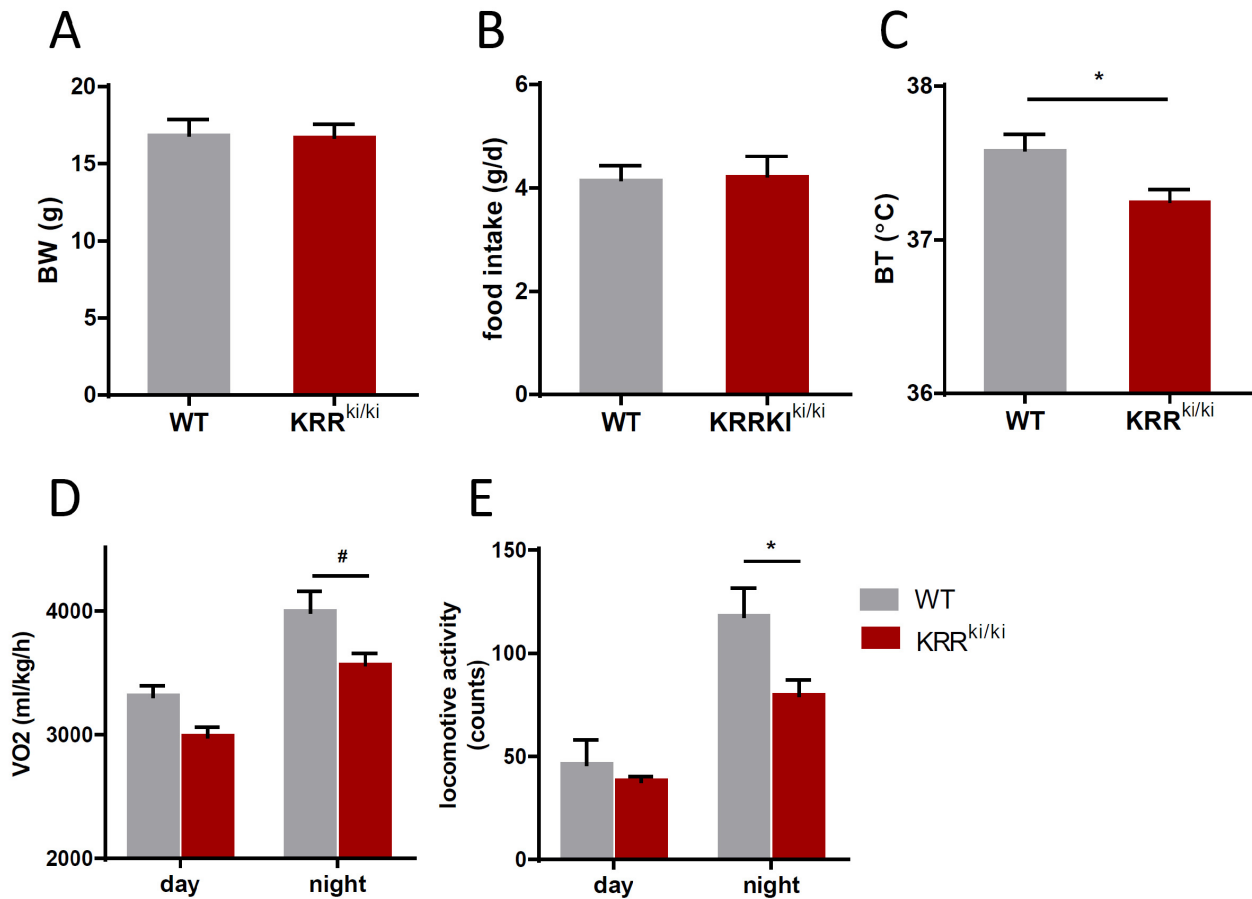

SUPPLEMENTARY DATA

**Supplementary Figure 4.** qRT-PCR analysis for mitochondrial biogenesis (A) and DNA content (B) of WT and KRR<sup>ki/ki</sup> pWAT (n = 6 per group). \* *P* < 0.05. C: Immunohistochemistry staining for UCP1 of WT and KRR<sup>ki/ki</sup> pWAT, iWAT, and BAT. Scale bar indicates 100 μm (n = 3-5 per group). Representative pictures are shown.

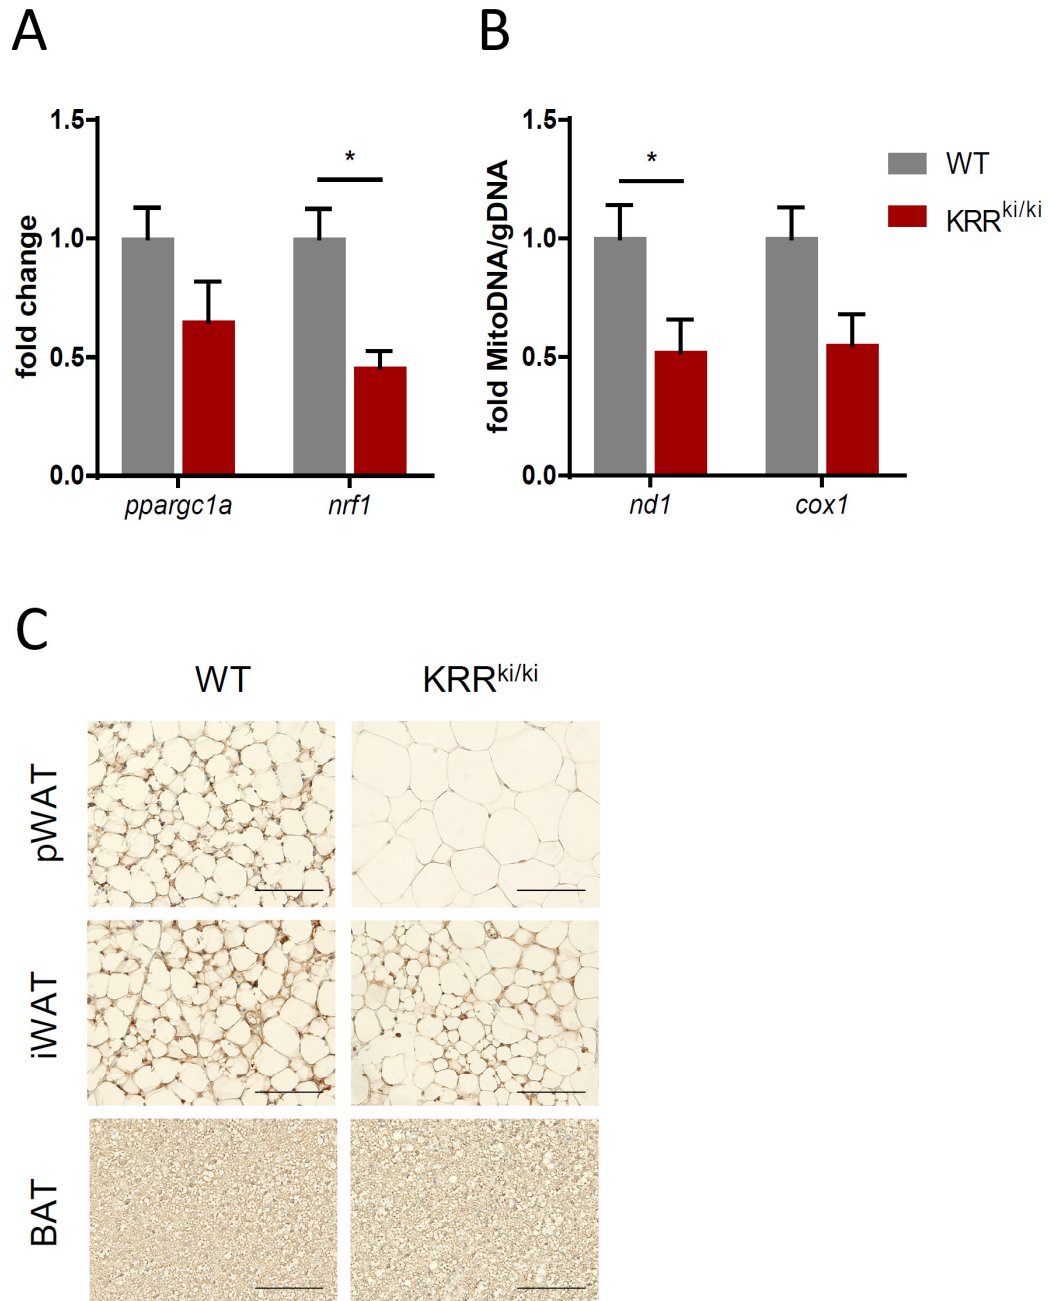

SUPPLEMENTARY DATA

**Supplementary Figure 5. Profiling analysis of multiple kinase signaling in hypothalamus.** The phospho-kinase array of hypothalamus lysates from WT and  $KRR^{ki/ki}$  mice. The right panel shows higher magnification of numbered spots on the left panel.

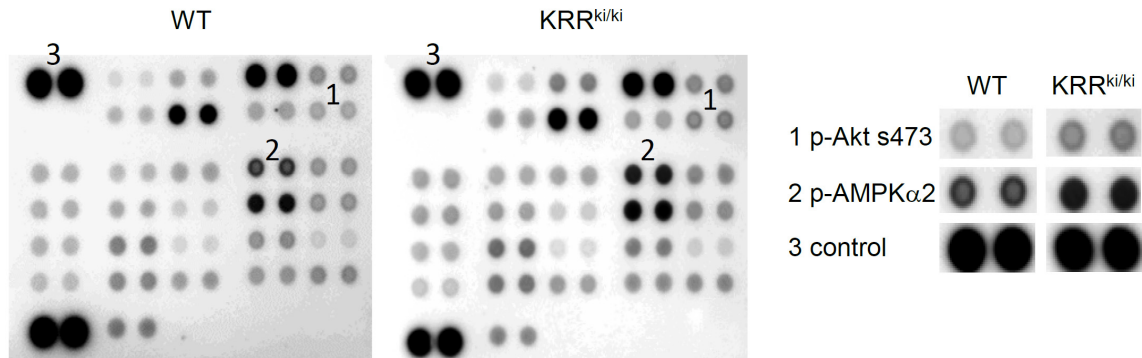

SUPPLEMENTARY DATA

**Supplementary Figure 6. A.** Daily food intake of WT and KRR<sup>ki/ki</sup> mice that received ICV administration of vehicle control (veh) or 2.5 μg FTY720 (FTY) twice a week (n = 6 per group). **B:** PP2A activity in peripheral tissues (n = 4 per group). Data are presented as mean ± SEM.

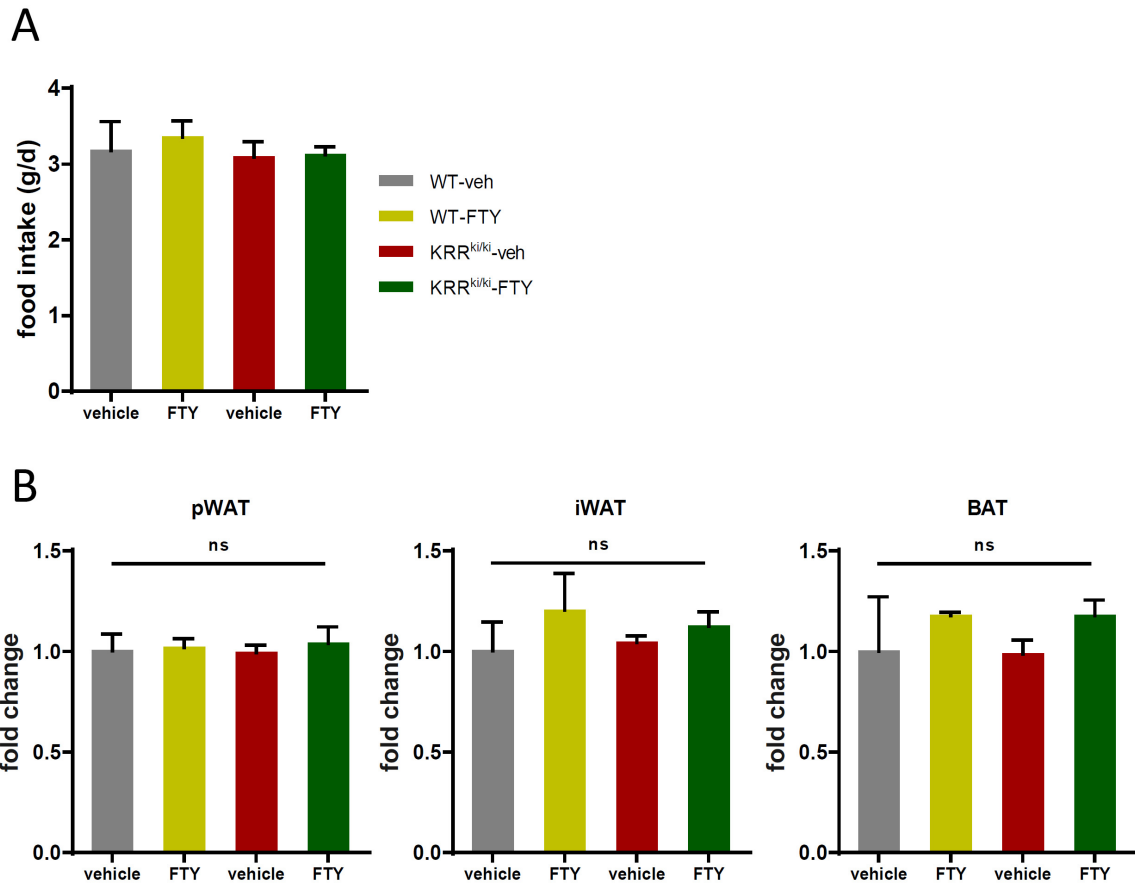

SUPPLEMENTARY DATA

**Supplementary Table 1.**

| Genes           | Primer forward             | Primer reverse           |
|-----------------|----------------------------|--------------------------|
| <i>tnf</i>      | TATGGCCCAGACCCTCAC         | GGTTGTCTTTGAGATCCATGC    |
| <i>serpine1</i> | CCTCCTCATCCTGCCTAAGTT      | GGCCAGGGTTGCACTAAAC      |
| <i>il6</i>      | TGATGGATGCTACCAAACCTGG     | TTCATGTACTCCAGGTAGCTATGG |
| <i>ccl2</i>     | CCACTCACCTGCTGCTACTCAT     | TGGTGATCCTCTTGTAGCTCTCC  |
| <i>adgre1</i>   | CTTTGGCTATGGGCTTCCAGTC     | GCAAGGAGGACAGAGTTTATCGTG |
| <i>il1a</i>     | TTGGTTAAATGACCTGCAACA      | GAGCGCTCACGAACAGTTG      |
| <i>il1b</i>     | AGTTGACGGACCCCAAAG         | AGCTGGATGCTCTCATCAGG     |
| <i>il10</i>     | CAGAGCCACATGCTCCTAGA       | TGTCCAGCTGGTCCTTTGTT     |
| <i>ucpl</i>     | GGCCTCTACGACTCAGTCCA       | TAAGCCGGCTGAGATCTTGT     |
| <i>elovl3</i>   | GCCTCTCATCCTCTGGTCCT       | GCTTGAGGCCCACTGTAAAC     |
| <i>cidea</i>    | GGCCGTGTTAAGGAATCTGC       | CATGAACCAGCCTTTGGTGC     |
| <i>cox8b</i>    | CCAGCCAAAACCTCCACTT        | GCTCTCCAAGTGGGCTAAGA     |
| <i>gapdh</i>    | CACTGAAGGGCATCTTGG         | CATTGTCATACCAGGAAATGAG   |
| <i>ppp2ca</i>   | CCTCACGTTGGTGTCCAGA        | GTTACTACGTTCCGGTCATGG    |
| <i>ppp2cb</i>   | CCACTTACAGCTTTAGTAGATGGACA | GCGATCCAGGGCTCTTATG      |
| <i>esr2</i>     | GACCCTCACTGGCACGTT         | AATCCCTTCCACGCACTTC      |
| <i>greb1</i>    | GACCGTCTACTACCTCGTCCA      | GCCAGGAGCGTAGGAAGAT      |
| <i>cox7a2l</i>  | TATTTGCCACACCAACCAAA       | TCAGGTGGAAACCATCAGC      |
| <i>agt</i>      | CGGAGGCAAATCTGAACAAC       | TCCTCCTCTCCTGCTTTGAG     |
| <i>c3</i>       | CGGCATAGAGAAGAGGCAAG       | AAGGCAGCATAGGCAGAGC      |
| <i>ppargc1a</i> | CCCTGCCATTGTTAAGACC        | TGCTGCTGTTCTGTTTTIC      |
| <i>nrf1</i>     | TGGAGTCCAAGATGCTAATGG      | GCGAGGCTGGTTACCACA       |
| <i>nd1</i>      | AATCGCCATAGCCTTCCTAACAT    | GGCGTCTGCAAATGGTTGTAA    |
| <i>cox1</i>     | CCCAATCTCTACCAGCATC        | GGCTCATAGTATAGCTGGAG     |
| <i>lpl</i>      | CGAGTCGTCTTCTCCTGATGAT     | TTCTGGATTCCAATGCTTCGA    |
